# Supplementary material
Source: PubMed Central journal article supplement (PMC3354589)

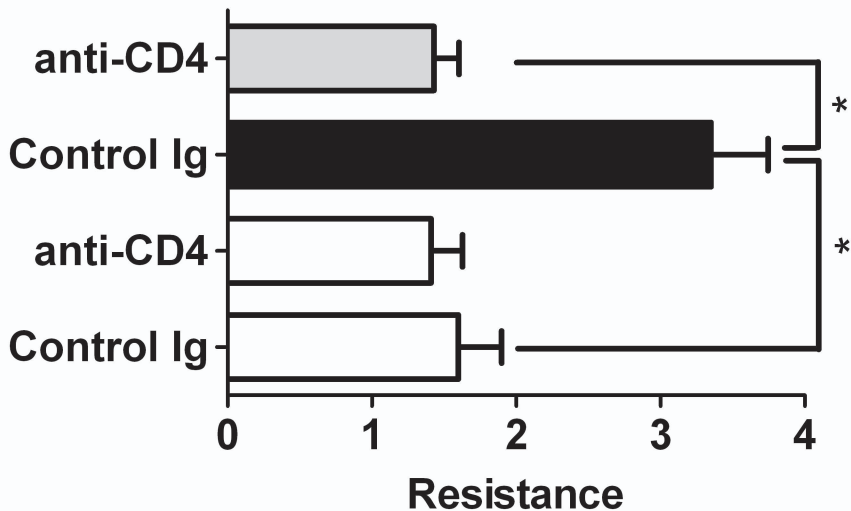

Ahrens et al., Supplementary Figure S2.

Supplement: mmc2.pdf [file mmc2.pdf]

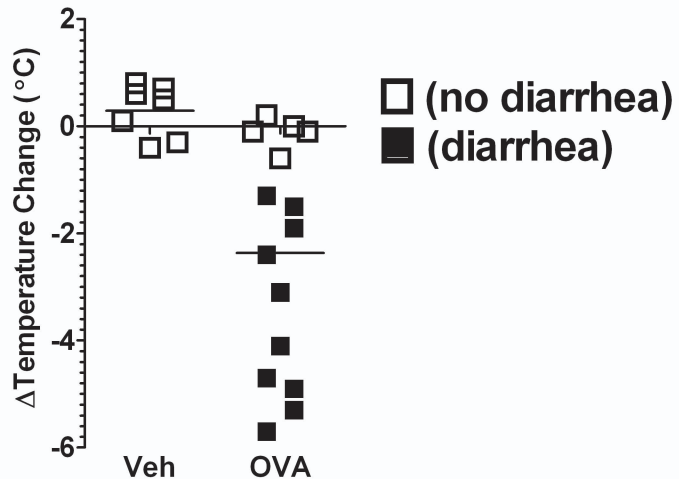

Ahrens et al., Supplementary Figure S3.

Supplement: mmc3.pdf [file mmc3.pdf]
